# Supplementary figures and images for: Unidirectional rotary motion in achiral molecular motors
Source: Springer Nature journal article supplement (doi:10.1038/nchem.2362), 2015-10-12

*(R,(Z,M),(E,P))-5*  
<sup>1</sup>H NMR

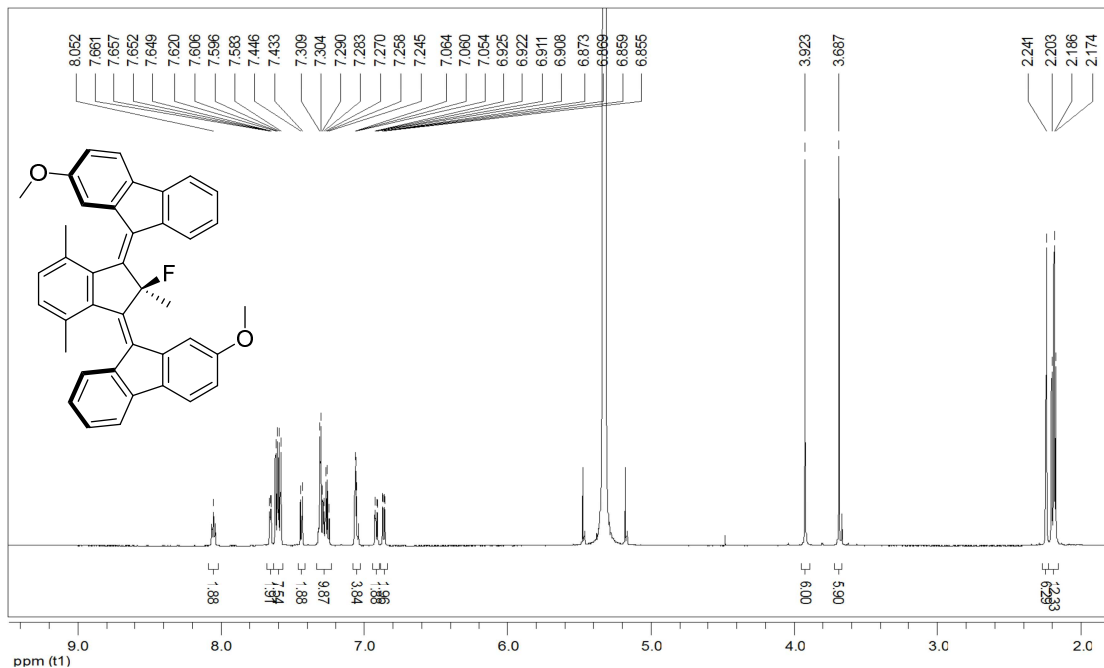

gCOSY NMR

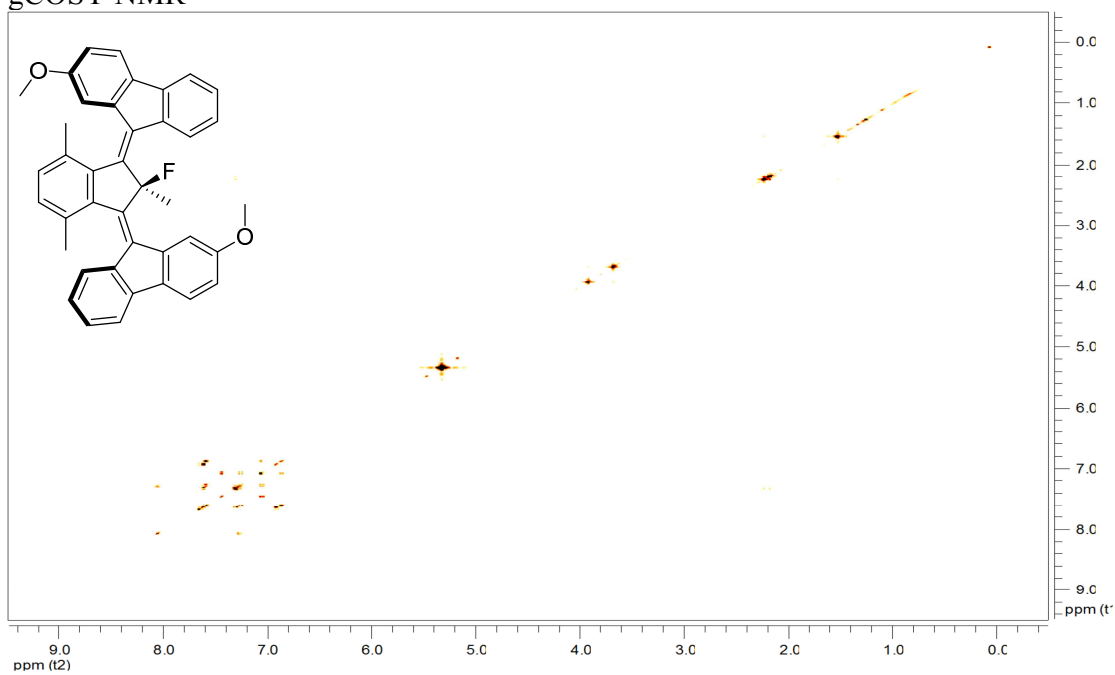

Supplement: 41557_2015_BFnchem2362_MOESM23_ESM.pdf [file 41557_2015_BFnchem2362_MOESM23_ESM.pdf]
